# Supplementary material
Source: Springer Nature journal article supplement (https://www.springermedizin.de/resource/supplementary/13000_2007_64_MOESM1_ESM.pdf/9623770)

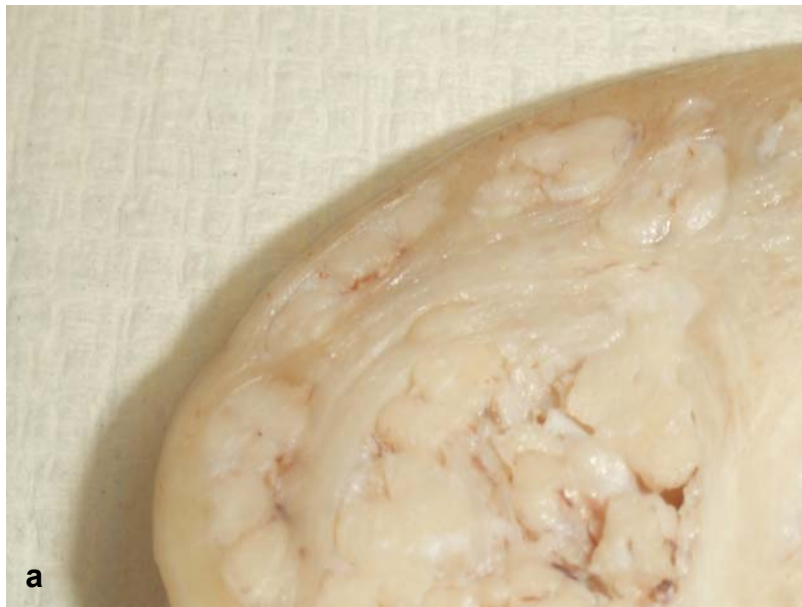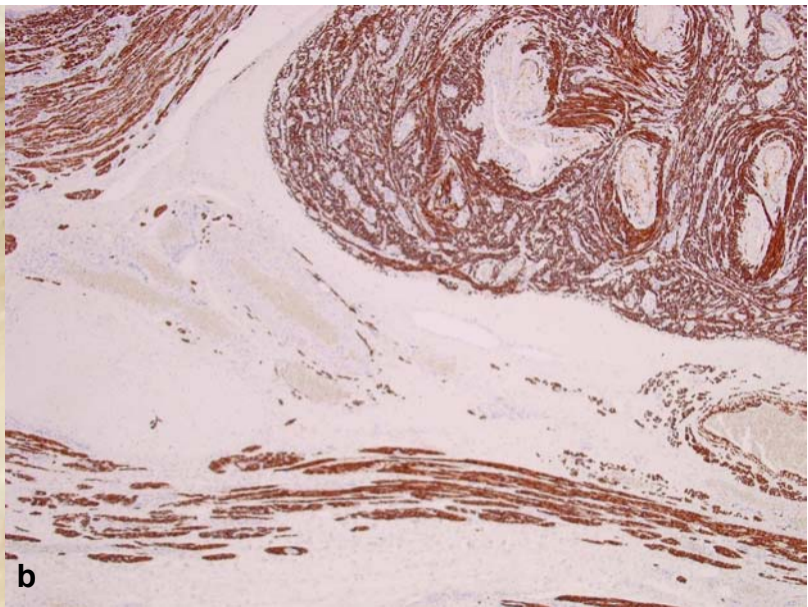

Supplement: MOESM1 [file 9623770]
